# Supplementary material for: Synthesis of free-standing sub-10 nm Y2O3:Eu particles on silicananowirematrix and amplified luminescence performance
Source: Royal Society of Chemistry journal article supplement (doi:10.1039/c2tc00139j), 2012-10-18
Supplement: c2tc00139j.pdf [file c2tc00139j.pdf]

Supporting Information for

**Synthesis of Free-standing Sub-10nm Y<sub>2</sub>O<sub>3</sub>:Eu Particles on Silica  
Nanowire Matrix and Amplified Luminescent Performance**

*Xin-Ling Liu,<sup>1</sup> Pei-Xin Zhu,<sup>2</sup> Yan-Feng Gao,<sup>1</sup> and Ren-Hua Jin<sup>3\*</sup>*

<sup>1</sup> Shanghai Institute of Ceramics, Chinese Academy of Sciences, 1295 Dingxi Road,  
Shanghai 200050, China

<sup>2</sup> Synthetic Chemistry Lab., Kawamura Institute of Chemical Research,  
631 Sakado, Sakura, 285-0078 Japan,

<sup>3</sup>Department of Materials and Life Chemistry, Faculty of Engineering, Kanagawa  
University, and JST-CREST, 3-27-1 Rokkakubashi, Kanagawa-ku, Yokohama,  
221-8686 Japan

Correspondence and requests for materials should be addressed to R.H.J.  
rhjin@kanagawa-u.ac.jp

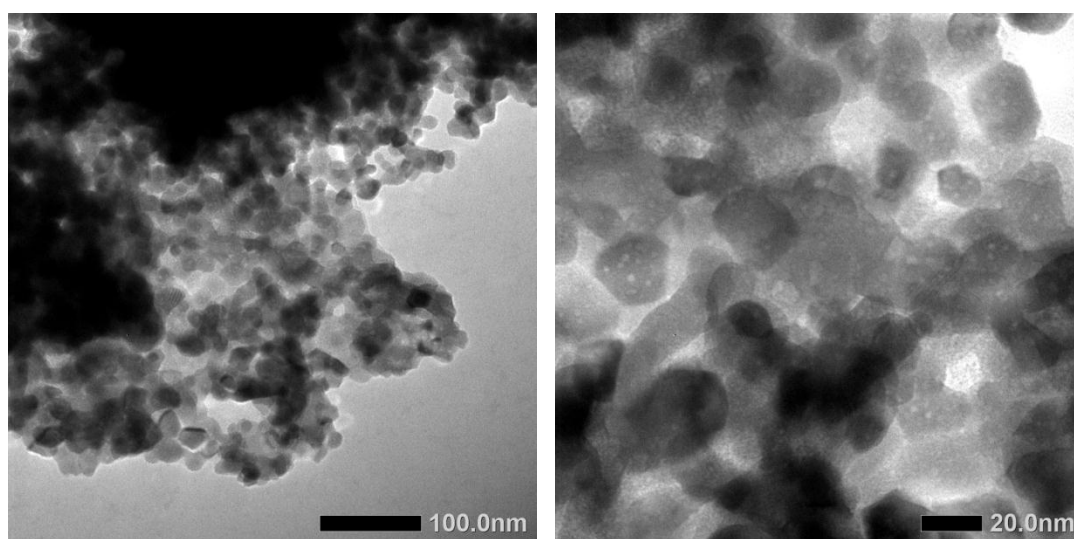

*Figure S1.* TEM images (left) and corresponding magnified TEM images (right) of  $\text{Y}_2\text{O}_3\text{:Eu}$  synthesized without PEI@ $\text{SiO}_2$  as matrix

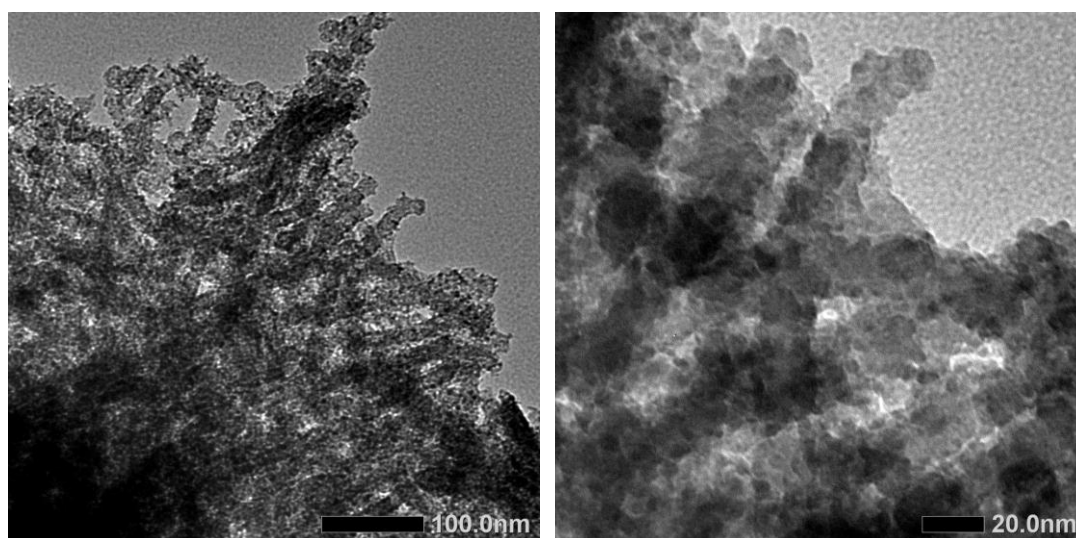

*Figure S2.* TEM images (left) and corresponding magnified TEM images (right) of  $\text{Y}_2\text{O}_3\text{:Tb@SNW}$  (the synthesis conditions were similar to that of  $\text{Y}_2\text{O}_3\text{:Eu@SNW}$  by replacing  $\text{Eu}(\text{OAc})_3$  with  $\text{Tb}(\text{OAc})_3$ )

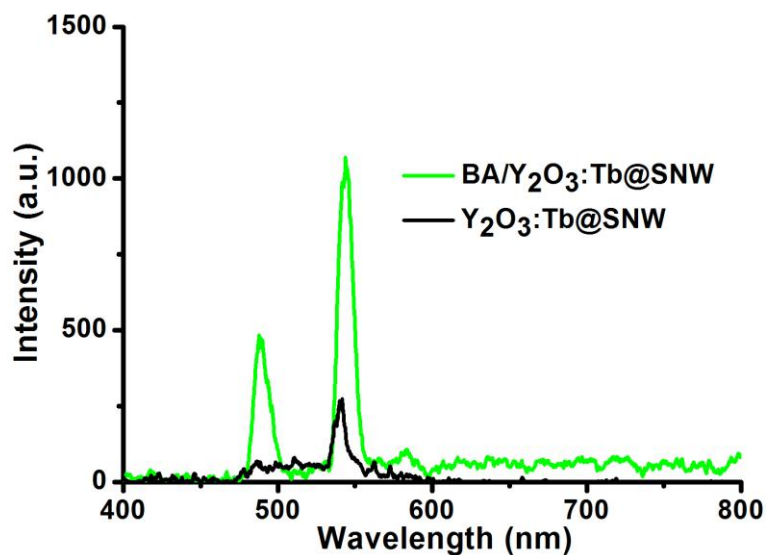

*Figure S3.* Emission spectra of (excited by 270nm) Y<sub>2</sub>O<sub>3</sub>:Tb@SNW (black line) and BA/ Y<sub>2</sub>O<sub>3</sub>:Tb@SNW (green line)

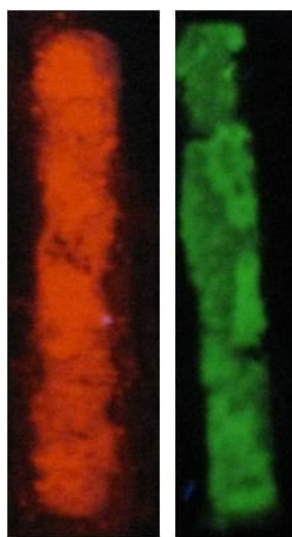

*Figure S4.* Snapshot images of the lined powders of BA/Y<sub>2</sub>O<sub>3</sub>:Eu@SNW (left) and BA/Y<sub>2</sub>O<sub>3</sub>:Tb@SNW (right) irradiated by UV light (254nm).
